# Supplementary material
Source: publisher figshare collection journal article supplement (https://sage.figshare.com/ndownloader/files/13765298)
Supplement: Supplementary file 1 [file 13765298]

Supplementary Table 2. Change in physical characteristics from baseline to MRF, excluding subjects who became fatigued during follow-up.

| Characteristic     | Fatigued,<br>N=1,470 | Not<br>Fatigued,<br>N=868 | OR (95%<br>CI) | Characteristic    | Fatigued,<br>N = 1,470 | Not<br>Fatigued,<br>N = 868 | OR (95%<br>CI) |
|--------------------|----------------------|---------------------------|----------------|-------------------|------------------------|-----------------------------|----------------|
| <b>Get up</b>      |                      |                           |                | <b>Bladder</b>    |                        |                             |                |
| <b>Worsened</b>    | 232 (16.0%)          | 103 (12.0%)               | 1.4 (1.1-1.8)* | <b>Worsened</b>   | 346 (24.0%)            | 123 (14.3%)                 | 1.9 (1.5-2.3)* |
| <b>Stable</b>      | 1214 (84.0%)         | 756 (88.0%)               | 1.00 (Ref)     | <b>Stable</b>     | 1096 (76.0%)           | 736 (85.7%)                 | 1.00 (Ref)     |
| <b>Stairs</b>      |                      |                           |                | <b>Vision</b>     |                        |                             |                |
| <b>Worsened</b>    | 233 (16.1%)          | 98 (11.4%)                | 1.5 (1.2-2.0)* | <b>Worsened</b>   | 300 (20.6%)            | 89 (10.3%)                  | 2.2 (1.7-2.8)* |
| <b>Stable</b>      | 1215 (83.9%)         | 763 (88.6%)               | 1.00 (Ref)     | <b>Stable</b>     | 1157 (79.4%)           | 772 (89.7%)                 | 1.00 (Ref)     |
| <b>Stand</b>       |                      |                           |                | <b>Loneliness</b> |                        |                             |                |
| <b>Worsened</b>    | 186 (12.9%)          | 101 (11.7%)               | 1.1 (0.9-1.5)  | <b>Worsened</b>   | 177 (12.2%)            | 55 (6.4%)                   | 2.0 (1.4-2.7)* |
| <b>Stable</b>      | 1256 (87.1%)         | 759 (88.3%)               | 1.00 (Ref)     | <b>Stable</b>     | 1273 (87.8%)           | 810 (93.6%)                 | 1.00 (Ref)     |
| <b>Drive</b>       |                      |                           |                | <b>Pessimism</b>  |                        |                             |                |
| <b>Worsened</b>    | 205 (14.2%)          | 96 (11.2%)                | 1.3 (1.0-1.7)  | <b>Worsened</b>   | 148 (10.2%)            | 70 (8.1%)                   | 1.3 (0.9-1.7)  |
| <b>Stable</b>      | 1239 (85.8%)         | 764 (88.8%)               | 1.00 (Ref)     | <b>Stable</b>     | 1301 (89.8%)           | 792 (91.9%)                 | 1.00 (Ref)     |
| <b>Pain</b>        |                      |                           |                | <b>Tense</b>      |                        |                             |                |
| <b>Worsened</b>    | 184 (12.7%)          | 135 (15.8%)               | 0.8 (0.6-1.0)  | <b>Worsened</b>   | 174 (12.1%)            | 75 (8.7%)                   | 1.4 (1.1-1.9)* |
| <b>Stable</b>      | 1262 (87.3%)         | 721 (84.2%)               | 1.00 (Ref)     | <b>Stable</b>     | 1265 (87.9%)           | 785 (91.3%)                 | 1.00 (Ref)     |
| <b>Pain extent</b> |                      |                           |                | <b>Panic</b>      |                        |                             |                |
| <b>Worsened</b>    | 76 (11.1%)           | 31 (16.3%)                | 0.6 (0.4-1.0)  | <b>Worsened</b>   | 88 (6.1%)              | 18 (2.1%)                   | 3.1 (1.9-5.2)* |
| <b>Stable</b>      | 611 (88.9%)          | 159 (83.7%)               | 1.00 (Ref)     | <b>Stable</b>     | 1355 (93.9%)           | 846 (97.9%)                 | 1.00 (Ref)     |
| <b>Upper Limbs</b> |                      |                           |                | <b>Annoyed</b>    |                        |                             |                |
| <b>Worsened</b>    | 381 (26.9%)          | 168 (19.6%)               | 1.5 (1.2-1.8)* | <b>Worsened</b>   | 154 (10.7%)            | 64 (7.5%)                   | 1.5 (1.1-2.0)* |
| <b>Stable</b>      | 1061 (73.1%)         | 691 (80.4%)               | 1.00 (Ref)     | <b>Stable</b>     | 1289 (89.3%)           | 7994 (92.5%)                | 1.00 (Ref)     |

|                    |              |             |                |                    |              |             |                |
|--------------------|--------------|-------------|----------------|--------------------|--------------|-------------|----------------|
| <b>Lower Limbs</b> |              |             |                | <b>Morbid Mood</b> |              |             |                |
| <b>Worsened</b>    | 412 (28.7%)  | 218 (25.5%) | 1.2 (1.0-1.4)  | <b>Worsened</b>    | 120 (8.3%)   | 39 (4.5%)   | 1.9 (1.3-2.7)* |
| <b>Stable</b>      | 1026 (71.3%) | 637 (74.5%) | 1.00 (Ref)     | <b>Stable</b>      | 1324 (91.7%) | 822 (95.5%) | 1.00 (Ref)     |
| <b>Bowel</b>       |              |             |                | <b>Guilt</b>       |              |             |                |
| <b>Worsened</b>    | 334 (23.1%)  | 115 (13.4%) | 1.9 (1.5-2.4)* | <b>Worsened</b>    | 136 (9.4%)   | 38 (4.4%)   | 2.2 (1.5-3.2)* |
| <b>Stable</b>      | 1115 (76.9%) | 746 (86.6%) | 1.00 (Ref)     | <b>Stable</b>      | 1314 (90.6%) | 822 (95.6%) | 1.00 (Ref)     |

Ref=Reference; Odds ratios and 95% confidence intervals for logistic regression models analyzing differences between those who reported fatigue at baseline and most recent follow-up, compared to those who reported no fatigue at baseline or most recent follow-up, adjusted for age, sex, baseline EDSS and MS type, DMT use and disease duration. P-values are adjusted for multiple comparisons. \*p-value<0.05.
